# Supplementary material for: Systems analysis of the genetic interaction network of yeast molecular chaperones
Source: Royal Society of Chemistry journal article supplement (doi:10.1039/c7mo00142h), 2018-03-02
Supplement: c7mo00142h3.xlsx [file c7mo00142h3.xlsx]

## Sheet: Table_S1
Prey proteins obtained from Sec63 MYTH experiments
ORF	Gene	CYC2014 complex
YDR086C	SSS1	Ssh1p_translocon_complex
YER019C-A	SBH2	Ssh1p_translocon_complex
YDR477W	SNF1	Snf1p/Snf4p/Sip1p_complex
YML055W	SPC2	signal_peptidase_complex
YLR292C	SEC72	Sec62p/Sec63p_complex
YOR103C	OST2	oligosaccharyl_transferase_complex
YDL232W	OST4	oligosaccharyl_transferase_complex
YEL002C	WBP1	oligosaccharyl_transferase_complex
YHR193C	EGD2	nascent_polypeptide-associated_complex
YPL037C	EGD1	nascent_polypeptide-associated_complex
YAL044C	GCV3	glycine_cleavage_complex
YML012W	ERV25	COPII
YLR110C	CCW12
YLR390W-A	CCW14
YEL027W	CUP5
YKL096W-A	CWP2
YOR383C	FIT3
YJL159W	HSP150
YOR153W	PDR5
YKL164C	PIR1
YEL060C	PRB1
YIL011W	TIR3
YGL194C-A	YGL194C-A
YHL026C	YHL026C
YJR085C	YJR085C
YKL152C	YKL152C
YPR028W	YOP1
YPL004C	LSP1
YBL030C	PET9
YHL048W	COS8
YKR030W	GMH1
YBR205W	KTR3
YBR293W	VBA2
YKL080W	VMA5
YPR075C	OPY2
YDR077W	SED1
YCR024C-B	YCR024C-B
YDR345C	HXT3
YOR306C	MCH5
YKR046C	PET10
YOR215C	YOR215C
YER072W	VTC1
YEL021W	URA3
YFR041C	ERJ5
YGL055W	OLE1
YJL158C	CIS3
YPL006W	NCR1
YCL005W-A	VMA9
YJL189W	YJL189W

## Sheet: Table_S2
CYC2014 complexes enriched in SEC63 negative GIs	CYC2014 complexes enriched in SEC63 positive GIs	CYC2014 complexes enriched in SEC63 GIPC
Sec62p/Sec63p_complex	Ssh1p_translocon_complex	Sec62p/Sec63p_complex
signal_peptidase_complex	septin_complex	signal_peptidase_complex		Complexes interacting with Sec63 in MYTH experiments
oligosaccharyl_transferase_complex	MIND_complex	oligosaccharyl_transferase_complex
Ssh1p_translocon_complex	Ndc80p_complex	Ssh1p_translocon_complex
nascent_polypeptide-associated_complex	nuclear_condensin_complex	COPII
Snf1p/Snf4p/Sip1p_complex	SCF-CDC4_complex	glycine_cleavage_complex
Rot2p/Gtb1p_complex	FACT_complex	Rot2p/Gtb1p_complex
Gcd10p/Gcd14p_complex	SPOTS_complex	Golgi_transport_complex
Isocitrate_dehydrogenase	Mcm2-7_complex	20S_proteasome
signal_recognition_particle_receptor_complex	Cdc48p_complex	GPI-anchor_transamidase_complex
Golgi_transport_complex	CCAAT-binding_factor_complex	Arp2/3_protein_complex
20S_proteasome	DNA_polymerase_epsilon_complex	TRAPP_complex
19/22S_regulator	GINS_complex	retromer_complex
GPI-anchor_transamidase_complex	TORC_1_complex	septin_complex
Elongator_complex	GET_complex	COPI
Arp2/3_protein_complex	Cdc7p/Dbf4p_complex	adenylyl_cyclase_complex
TRAPP_complex	Lge1p/Bre1p_complex	Protein_O-mannosyltransferase(Pmt1p/Pmt2p)
smc5p-Smc6p_complex	mRNA_guanylyl_transferase_(capping_complex)	Ino2p/Ino4p_basic_helix-loop-helix_heteromeric_complex
retromer_complex	transcription_factor_TFIID_complex	SPOTS_complex
septin_complex	Swr1p_complex	glycosylphosphatidylinositol-N-acetylglucosaminyltransferase_(GPI-GnT)_complex
transcription_factor_TFIIIC_complex	Set3p_complex	polarisome
Rpd3L_complex	alpha_DNA_polymerase:primase_complex	Cdc48p_complex
MIND_complex	mRNA_cleavage_factor_complex_(CFI)	actin_cytoskeleton-regulatory_complex,_Pan1p/Sla1p/End3p_complex
Ndc80p_complex	Origin_recognition_complex	Sec61p_translocon_complex
chromosome_passenger_complex	Tof1p/Mrc1p/Csm3p_complex	calcineurin_complex
COPI	Prp19-associated_complex	Sum1p/Rfm1p/Hst1p_complex
Exocyst_complex	box_C/D_snoRNP_complex	GSH_degradosomal_complex
nucleolar_ribonuclease_P_complex	DNA_replication_factor_C_complex_(Rad24p)	TORC_2_complex
nuclear_condensin_complex	1,3-beta-glucan_synthase_complex_(Fks1p/Rho1p)	GARP_complex
SCF-CDC4_complex	Bub1p/Bub3p_complex	GET_complex
commitment_complex	Decapping_Enzyme_Complex	UTP_B_complex
FACT_complex	Gip1p/Glc7p_complex	alpha-1,6-mannosyltransferase_complex(Anp1p/Mnn9p)
adenylyl_cyclase_complex	Mob1p/Dbf2p_complex	UDP-N-acetylglucosamine_transferase_complex
Protein_O-mannosyltransferase(Pmt1p/Pmt2p)	Mob2p/Cbk1p_complex	fatty_acid_synthase_complex
Ino2p/Ino4p_basic_helix-loop-helix_heteromeric_complex	Rsp5p/Bul1_ubiquitin_ligase_complex	Mtr2p/Mex67p_complex
Cdc28p/Clb5p_complex	Sap190p/Sit4p_complex	alpha-1,6-mannosyltransferase_complex(Van1p/Mnn9p)
cohesin_loading_factor_complex	Sgv1p/Bur2p_complex	Pho85p/Pho80p_complex
Dop1p/Mon2p_complex	Shq1p/Naf1p_complex	Pho85p/Pcl8p_complex
Geranylgeranyltransferase_II_(GGTase_II)	translation_release_factor_complex	TRC_complex
Grh1p/Bug1p_complex	DNA_replication_factor_C_complex_(Ctf18p/Ctf8p/dcc1p)	chaperonin-containing_T-complex
guanyl-nucleotide_exchange_factor_complex	nuclear_pore_cytoplasmic_filaments	SNARE_complex
Mon1p/Ccz1p_complex	anaphase-promoting_complex	Nonsense-mediated_mRNA_decay_pathway_complex
Nem1p/Spo7p_complex	Kornberg's_mediator_(SRB)_complex	luminal_surveillance_complex
Noc1p/Noc2p_complex	chromatin_assembly_complex	Sro1p/Sec4p/Sec9p_complex
Noc4p/Nop14p_complex	Ctf3p_protein_complex	RAVE_complex
prohibitin_complex	Hym1p/Kic1p/Sog2p_complex	phosphatidylinositol_(PtdIns)_3-kinase_complex_(functions_in_CPY_sorting)
Rtt109p/Vps75p_complex	Iml1_complex	PAM_complex
Rvs161p/Rvs167p_complex	protein_phosphatase_type_2A_complex_(Rts1p)	Doa10p_ubiquitin_ligase_complex
Sfb3p/Sec23p_complex	RNA_Degradation_Complex	RNA_polymerase_I_upstream_activating_factor_complex
Sur1p/Csg2p_complex	Tap42p/Sit4p/Rrd1p_complex
Ubp3p/Bre5p_complex	transcription_factor_TFIIH_complex
SPOTS_complex	SAGA_complex
Mcm2-7_complex	AP-2_adaptor_complex
glycosylphosphatidylinositol-N-acetylglucosaminyltransferase_(GPI-GnT)_complex	CBF3_complex
polarisome	COMA_complex
mitochondrial_inner_membrane_presequence_translocase_complex	HIR_complex
ASTRA_complex	nuclear_pore_inner_ring
SPB_components	protein_kinase_CK2_complex
Cdc48p_complex	SBF_transcription_complex
actin_cytoskeleton-regulatory_complex,_Pan1p/Sla1p/End3p_complex	tRNA-intron_endonuclease_complex
Sec61p_translocon_complex	Nuclear_exosome_complex
calcineurin_complex	EKC/KEOPS_protein_complex
Sum1p/Rfm1p/Hst1p_complex	Npa2p-containing_subcomplex
GSH_degradosomal_complex	nuclear_cohesin_complex
Cdc48p/Npl4p/Vms1p_AAA_ATPase_complex	Rpd3S_complex
DNA_polymerase_delta_complex	UTP_B_complex
gamma-tubulin_complex	BLOC-1_complex
Nrd1_complex	ER_membrane_protein_complex
Ntr1p/Ntr2p/Prp43p_complex	OCA_complex
Prp9p/Prp11p/Prp21p_complex(SF3a_complex)	signalosome_complex
RENT_complex
TORC_2_complex
CCAAT-binding_factor_complex
DNA_polymerase_epsilon_complex
GINS_complex
TORC_1_complex
GARP_complex
Cdc24p/Far1p/Gbetagamma_protein_complex
ESCRT_III_complex
MBF_transcription_complex
